# Supplementary material for: Experience, Knowledge, and Perceptions of Pharmacogenomics among Pharmacists and Nurse Practitioners in Alberta Hospitals
Source: MDPI journal article supplement (doi:10.3390/pharmacy10060139), 2022-10-26
Supplement: s1 [file s1]

**Table S1.** Demographics of survey respondents by profession. Physicians excluded due to low response rate.

| Characteristic                                    | n (%)                |        |                              |        |
|---------------------------------------------------|----------------------|--------|------------------------------|--------|
|                                                   | Pharmacists (n = 91) |        | Nurse Practitioners (n = 37) |        |
| Years in Practice*                                |                      |        |                              |        |
| Less than 2 years                                 | 5                    | (5.6)  | 2                            | (5.4)  |
| 2-5 years                                         | 13                   | (14.4) | 7                            | (18.9) |
| 6-10 years                                        | 12                   | (13.3) | 14                           | (37.8) |
| 11-15 years                                       | 12                   | (13.3) | 6                            | (16.2) |
| 16-20 years                                       | 13                   | (14.4) | 5                            | (13.5) |
| More than 20 years                                | 35                   | (38.9) | 3                            | (8.1)  |
| Location of Practice<br>(Number of inhabitants)** |                      |        |                              |        |
| Rural (0-50,000) or Locum                         | 9                    | (10.1) | 4                            | (10.8) |
| Suburban (50,001-250,000)                         | 17                   | (19.1) | 8                            | (21.6) |
| Urban (greater than 250,000)                      | 64                   | (71.9) | 25                           | (67.6) |
| Specialty**                                       |                      |        |                              |        |
| None / general medicine                           | 17                   | (18.9) | 6                            | (16.2) |
| Pediatric / neonatal medicine                     | 11                   | (6.7)  | 6                            | (16.2) |
| Oncology                                          | 10                   | (11.1) | 7                            | (18.9) |
| Adult intensive care or emergency medicine        | 10                   | (11.1) | 5                            | (13.5) |
| Psychiatry                                        | 9                    | (10.0) | 0                            | (0)    |
| Cardiology and stroke                             | 8                    | (8.9)  | 2                            | (5.4)  |
| Geriatrics                                        | 6                    | (6.7)  | 3                            | (8.1)  |
| Infectious diseases                               | 6                    | (6.7)  | 1                            | (2.7)  |
| Pain and palliative care                          | 5                    | (5.6)  | 2                            | (5.4)  |
| Other**                                           | 4                    | (4.4)  | 3                            | (8.1)  |
| Prior Training and Exposure to Pharmacogenomics   |                      |        |                              |        |
| Prior education                                   | 29/84                | (34.5) | 7/35                         | (20.0) |
| Prior use in practice                             | 23/84                | (27.4) | 5/35                         | (14.3) |

N=134 \*two missing responses; \*\*non-cardiac surgery (n=2), human immunodeficiency virus (n=1), neurology (n=1), transplant (n=1), psychiatry (n=1).
